# Supplementary material
Source: ML conference proceedings conference paper supplement (https://openreview.net/forum?id=bhiGno-Cxq)
Supplement: supplementary_material [file attachment]

## 224 **Supplementary Material**

### 225 **MLP Binary Connect Architecture**

|                                                    |
|----------------------------------------------------|
| Dropout p = 0.2                                    |
| Fully Connected Layer (units = 2048, bias = False) |
| ReLU                                               |
| Batch Normalization Layer (gain = 1, bias = 0)     |
| Dropout p = 0.2                                    |
| Fully Connected Layer (units = 2048, bias = False) |
| ReLU                                               |
| Batch Normalization Layer (gain = 1, bias = 0)     |
| Dropout p = 0.2                                    |
| Fully Connected Layer (units = 2048, bias = False) |
| ReLU                                               |
| Batch Normalization Layer (gain = 1, bias = 0)     |
| Dropout p = 0.2                                    |
| Fully Connected Layer (units = 2048, bias = False) |
| Batch Normalization Layer (gain = 1, bias = 0)     |
| Softmax                                            |

### 226 **VGG Binary Connect Architecture**

|                                                                                       |
|---------------------------------------------------------------------------------------|
| Convolutional Layer (channels = 128, kernel-size = 3×3, bias = False, padding = same) |
| ReLU                                                                                  |
| Batch Normalization Layer (gain = 1, bias = 0)                                        |
| Convolutional Layer (channels = 128, kernel-size = 3×3, bias = False, padding = same) |
| ReLU                                                                                  |
| Max Pooling Layer (size = 2×2, stride = 2×2)                                          |
| Batch Normalization Layer (gain = 1, bias = 0)                                        |
| Convolutional Layer (channels = 256, kernel-size = 3×3, bias = False, padding = same) |
| ReLU                                                                                  |
| Batch Normalization Layer (gain = 1, bias = 0)                                        |
| Convolutional Layer (channels = 256, kernel-size = 3×3, bias = False, padding = same) |
| ReLU                                                                                  |
| Max Pooling Layer (size = 2×2, stride = 2×2)                                          |
| Batch Normalization Layer (gain = 1, bias = 0)                                        |
| Convolutional Layer (channels = 512, kernel-size = 3×3, bias = False, padding = same) |
| ReLU                                                                                  |
| Batch Normalization Layer (gain = 1, bias = 0)                                        |
| Convolutional Layer (channels = 512, kernel-size = 3×3, bias = False, padding = same) |
| ReLU                                                                                  |
| Max Pooling Layer (size = 2×2, stride = 2×2)                                          |
| Batch Normalization Layer (gain = 1, bias = 0)                                        |
| Fully Connected Layer (units = 1024, bias = False)                                    |
| ReLU                                                                                  |
| Batch Normalization Layer (gain = 1, bias = 0)                                        |
| Fully Connected Layer (units = 1024, bias = False)                                    |
| ReLU                                                                                  |
| Batch Normalization Layer (gain = 1, bias = 0)                                        |
| Fully Connected Layer (units = 10, bias = False)                                      |
| Batch Normalization Layer (gain = 1, bias = 0)                                        |
| Softmax                                                                               |

|                                                   |
|---------------------------------------------------|
| Fully Connected Layer (units = 100, bias = False) |
| ReLU                                              |
| Batch Normalization Layer (gain = 1, bias = 0)    |
| Fully Connected Layer (units = 100, bias = False) |
| ReLU                                              |
| Batch Normalization Layer (gain = 1, bias = 0)    |
| Fully Connected Layer (units = 100, bias = False) |
| ReLU                                              |
| Batch Normalization Layer (gain = 1, bias = 0)    |
| Softmax                                           |

|                                                                                      |
|--------------------------------------------------------------------------------------|
| Convolutional Layer (channels = 32, kernel-size = 5×5, bias = False, padding = same) |
| Max Pooling Layer (size = 2×2, stride = 2×2)                                         |
| Batch Normalization Layer (gain = 1, bias = 0)                                       |
| ReLU                                                                                 |
| Convolutional Layer (channels = 64, kernel-size = 5×5, bias = False, padding = same) |
| Max Pooling Layer (size = 2×2, stride = 2×2)                                         |
| Batch Normalization Layer (gain = 1, bias = 0)                                       |
| ReLU                                                                                 |
| Fully Connected Layer (units = 512, bias = False)                                    |
| Batch Normalization Layer (gain = 1, bias = 0)                                       |
| ReLU                                                                                 |
| Fully Connected Layer (units = 10, bias = False)                                     |
| Batch Normalization Layer (gain = 1, bias = 0)                                       |
| Softmax                                                                              |

|                                                                                       |
|---------------------------------------------------------------------------------------|
| Convolutional Layer (channels = 128, kernel-size = 3×3, bias = False, padding = same) |
| Batch Normalization Layer (gain = 1, bias = 0)                                        |
| ReLU                                                                                  |
| Convolutional Layer (channels = 128, kernel-size = 3×3, bias = False, padding = same) |
| Batch Normalization Layer (gain = 1, bias = 0)                                        |
| Max Pooling Layer (size = 2×2, stride = 2×2)                                          |
| ReLU                                                                                  |
| Convolutional Layer (channels = 256, kernel-size = 3×3, bias = False, padding = same) |
| Batch Normalization Layer (gain = 1, bias = 0)                                        |
| ReLU                                                                                  |
| Convolutional Layer (channels = 256, kernel-size = 3×3, bias = False, padding = same) |
| Batch Normalization Layer (gain = 1, bias = 0)                                        |
| Max Pooling Layer (size = 2×2, stride = 2×2)                                          |
| ReLU                                                                                  |
| Convolutional Layer (channels = 512, kernel-size = 3×3, bias = False, padding = same) |
| Batch Normalization Layer (gain = 1, bias = 0)                                        |
| ReLU                                                                                  |
| Convolutional Layer (channels = 512, kernel-size = 3×3, bias = False, padding = same) |
| Batch Normalization Layer (gain = 1, bias = 0)                                        |
| Max Pooling Layer (size = 2×2, stride = 2×2)                                          |
| ReLU                                                                                  |
| Fully Connected Layer (units = 1024, bias = False)                                    |
| Batch Normalization Layer (gain = 1, bias = 0)                                        |
| ReLU                                                                                  |
| Fully Connected Layer (units = 10, bias = False)                                      |
| Batch Normalization Layer (gain = 1, bias = 0)                                        |
| Softmax                                                                               |

### 230 **Semantic Segmentation using BayesBiNN with augmented dataset**

231 We generated 1260 images from 30 original images using the rotation, random horizontal flip, random vertical flip  
 232 operations. The result for BayesBiNN with this extended dataset was still very poor and inconsistent with the other  
 233 methods (STE and Full Precision). The results presented in Section 5.4 were to show the extent of difficulty to train  
 234 BayesBiNN for segmentation task as even with such a small dataset and large number of epochs, it was still not even  
 235 able to overfit. Following are some of the images obtained by using BayesBiNN with this bigger dataset:

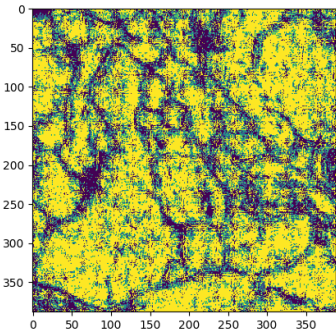

(a) Mask example 1

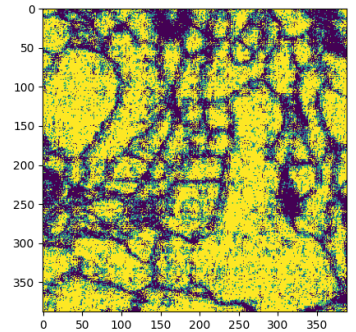

(b) Mask example 2
