# Supplementary material
Source: ML conference proceedings conference paper supplement (https://openreview.net/forum?id=bhiGno-Cxq)
Supplement: supplementary_material [file attachment]

version https://git-lfs.github.com/spec/v1
oid sha256:b27f467fd3292ee0ae160303235b992acc55e44075f594735c03a6c2130b72ac
size 7263150
